# Supplementary material for: The genetic profile of Leber congenital amaurosis in an Australian cohort
Source: PubMed Central journal article supplement (PMC5702575; doi:10.1002/mgg3.321), 2017-08-22
Supplement: MGG3-5-652-s001.pdf [file MGG3-5-652-s001.pdf]

**Supplementary Table 1A: Pedigree information displayed by functional categories of genes, identifying genetic variants that account for or are likely to account for disease in this cohort.**

| Family ID                                | Proband Variant ID<br>Nucleotide changes |                                                                                            | Siblings             |                | Other family members                  | Comments                                                                                          |
|------------------------------------------|------------------------------------------|--------------------------------------------------------------------------------------------|----------------------|----------------|---------------------------------------|---------------------------------------------------------------------------------------------------|
|                                          | Paternal Allele                          | Maternal Allele                                                                            | Allele 1             | Allele 2       |                                       |                                                                                                   |
| <b>Ciliary transport and trafficking</b> |                                          |                                                                                            |                      |                |                                       |                                                                                                   |
| <b>CEP290 (NM_025114.3)</b>              |                                          |                                                                                            |                      |                |                                       |                                                                                                   |
| 0623                                     | c.4625_4626insCATG                       | c.2991+1655A>G                                                                             | WT                   | WT             | -                                     |                                                                                                   |
| 1015                                     | c.2991+1655A>G                           | c.3181_3182del                                                                             | c.3181_3182del       | WT             | -                                     | -                                                                                                 |
| 1212                                     | c.2991+1655A>G                           | c.1781T>A                                                                                  | WT                   | WT             | -                                     |                                                                                                   |
| 1576                                     | c.5587-1G>C                              | c.3175dup                                                                                  | c.3175dup            | WT             | -                                     | -                                                                                                 |
|                                          |                                          |                                                                                            | c.3175dup            | WT             |                                       |                                                                                                   |
|                                          |                                          |                                                                                            | c.5587-1G>C          | WT             |                                       |                                                                                                   |
| 1950                                     | c.2991+1655A>G                           | c.297+3A>G                                                                                 | c.2991+1655A>G       | WT             | 2 <sup>nd</sup> cousins<br>(maternal) |                                                                                                   |
|                                          | c.2991+1655A>G                           | c.297+3A>G                                                                                 | -                    | -              |                                       |                                                                                                   |
| <b>LCA5 (NM_001122769.2)</b>             |                                          |                                                                                            |                      |                |                                       |                                                                                                   |
| 1894                                     | c.1144_1147dup                           | c.1144_1147dup                                                                             | c.1144_1147dup       | c.1144_1147dup | -                                     | <b>Consanguinity</b><br>Clinical diagnosis of fundus albipunctatus (1) and cone-rod dystrophy (1) |
| <b>RPGRIP1 (NM_020366.3)</b>             |                                          |                                                                                            |                      |                |                                       |                                                                                                   |
| 0479                                     | c.1219C>T;1763-8C>G                      | c.exon19del<br>chr14:g.(21798302_21798377)<br>_(21798551_21799045)del<br>(hg19,NC000014.8) | c.1219C>T; 1763-8C>G | c.exon19del    |                                       |                                                                                                   |
| 1642                                     | c.2935C>T                                | c.1447C>T                                                                                  | c.1447C>T            | c.2935C>T      | -                                     | +RPGRIP1<br>c.1639G>T<br>(benign)                                                                 |
| <b>SPATA7 (NM_018418.4)</b>              |                                          |                                                                                            |                      |                |                                       |                                                                                                   |
| 1543                                     | c.763C>T                                 | c.763C>T                                                                                   | c.763C>T             | c.763C>T       | -                                     | -                                                                                                 |
|                                          |                                          |                                                                                            | c.763C>T             | WT             |                                       |                                                                                                   |
|                                          |                                          |                                                                                            | WT                   | WT             |                                       |                                                                                                   |

| <b>TULP1 (NM_003322.3)</b>       |                                                      |                      |            |           |                                                             |                                                                                                                                |
|----------------------------------|------------------------------------------------------|----------------------|------------|-----------|-------------------------------------------------------------|--------------------------------------------------------------------------------------------------------------------------------|
| 1620                             | WT                                                   | c.524dup<br>c.524dup | WT         | WT        | Carrier c.524dup<br>(maternal first cousin<br>once removed) | Maternal isodisomy<br>of chromosome 6;<br>also harbours a<br>variant in <i>RP1</i><br>(c.1267-1656delinsA<br>p.Ala423Asnfs*11) |
| 2175                             | c.1081C>T                                            | c.999+5G>C           | c.999+5G>C | c.1081C>T | -                                                           | -                                                                                                                              |
| <b>Visual cycle</b>              |                                                      |                      |            |           |                                                             |                                                                                                                                |
| <b>RDH12 (NM_152443.2)</b>       |                                                      |                      |            |           |                                                             |                                                                                                                                |
| 1425                             | c.316C>T <sup>NT</sup> and c.697G>C <sup>NT</sup>    |                      | DNWTP      |           | None                                                        | Biallelism not<br>determined                                                                                                   |
| <b>RPE65 (NM_000329.2)</b>       |                                                      |                      |            |           |                                                             |                                                                                                                                |
| 1404                             | c.951_956del                                         | c.130C>T             | -          | -         | -                                                           |                                                                                                                                |
| 1723                             | c.1040G>C <sup>NT</sup> and c.726-1G>A <sup>NT</sup> |                      | -          | -         | Aboriginal family                                           | Biallelism not<br>determined<br>+ RPGRIP1<br>c.1767G>T<br>p.Gln589His                                                          |
| <b>Phototransduction cascade</b> |                                                      |                      |            |           |                                                             |                                                                                                                                |
| <b>GUCY2D (NM_000180.3)</b>      |                                                      |                      |            |           |                                                             |                                                                                                                                |
| 0535                             | c.307G>A                                             | c.2595del            | -          | -         | -                                                           |                                                                                                                                |
| 1836                             | c.2302C>T                                            | c.2516del            | -          | -         | -                                                           | -                                                                                                                              |
| 2019                             | c.91dup                                              | c.307G>A             | -          | -         | -                                                           | -                                                                                                                              |
| 2123                             | c.2646C>G                                            | c.2383C>T            | -          | -         |                                                             | + (paternal) interstitial<br>deletion 2q13                                                                                     |
| 2599                             | c.2302C>T                                            | c.2302C>T            | -          | -         |                                                             | + GUCY2D<br>c.2345T>A<br>(benign)                                                                                              |

| <b>Cell – cell interaction</b>            |                            |                            |                                    |                      |                                           |                                                                  |
|-------------------------------------------|----------------------------|----------------------------|------------------------------------|----------------------|-------------------------------------------|------------------------------------------------------------------|
| <b><i>CRB1</i> (NM_201253.2)</b>          |                            |                            |                                    |                      |                                           |                                                                  |
| 0306                                      | c.1793del                  | c.2843G>A                  | c.1793del<br>c.1793del             | c.2843G>A<br>WT      | -                                         | -                                                                |
| <b>2274</b>                               | c.2843G>A                  | c.613_619del <sup>BD</sup> | c.613_619del                       | WT                   | -                                         | Maternal DNA not available; allele identified in sibling         |
| <b>Neuroprotection</b>                    |                            |                            |                                    |                      |                                           |                                                                  |
| <b><i>NMNAT1</i> (NM_022787.3)</b>        |                            |                            |                                    |                      |                                           |                                                                  |
| <b>1565</b>                               | c.769G>A                   | c.507G>A                   | -                                  | -                    | -                                         | -                                                                |
| <b>1819</b>                               | c.500A>G                   | c.364del                   | -                                  | -                    | -                                         | Paternal c.364delA<br>Maltese descent                            |
| <b>1965</b>                               | c.364del                   | c.769G>A                   | c.364del                           | WT                   | -                                         | Paternal c.364delA<br>Maltese descent                            |
| <b>Protein chaperones and trafficking</b> |                            |                            |                                    |                      |                                           |                                                                  |
| <b><i>AIPL1</i> (NM_014336.3)</b>         |                            |                            |                                    |                      |                                           |                                                                  |
| 2030                                      | c.356_359del <sup>BD</sup> | c.834G>A                   | c.356_359del<br>c.356_359del<br>WT | c.834G>A<br>WT<br>WT |                                           | Paternal DNA not available; allele identified in sibling         |
| 2272                                      | c.834G>A <sup>BD</sup>     | c.277-2A>G                 | c.834G>A                           | c.277-2A>G           | Carrier c.834G>A<br>(paternal great aunt) | Paternal DNA not available; allele identified in paternal family |

Pedigree ID in Bold indicates simplex case. BD = by default (parental DNA not available but variant detected in related family member); DNWTP = did not wish to participate; NT = not tested; WT = wildtype allele. All heterozygous and homozygous WT individuals were unaffected.
