# Supplementary material for: The genetic profile of Leber congenital amaurosis in an Australian cohort
Source: PubMed Central journal article supplement (PMC5702575; doi:10.1002/mgg3.321), 2017-08-22
Supplement: MGG3-5-652-s005.pdf [file MGG3-5-652-s005.pdf]

**Supplementary Table 4 – Comparison of available clinical or participant-derived information displayed by functional category**

| ID                                       | Genotype                                 | Nystagmus | VA                    | ERG/VEP                                                                        | Photophobia | Nyctalopia | Ref Err | Ant Seg Abn | Retinal fundus changes<br>Comments                                                                                                                                                                                                                                | Dx                  |
|------------------------------------------|------------------------------------------|-----------|-----------------------|--------------------------------------------------------------------------------|-------------|------------|---------|-------------|-------------------------------------------------------------------------------------------------------------------------------------------------------------------------------------------------------------------------------------------------------------------|---------------------|
| <b>Ciliary transport and trafficking</b> |                                          |           |                       |                                                                                |             |            |         |             |                                                                                                                                                                                                                                                                   |                     |
| <b>CEP290 (NM_025114.3)</b>              |                                          |           |                       |                                                                                |             |            |         |             |                                                                                                                                                                                                                                                                   | <b>OMIM #611755</b> |
| 0623                                     | c.4625_4626insCATG<br>c.2991+1655A>G     | ✓         | NLP since birth       | <b>0<sup>10</sup></b> Bilaterally flat ERG tracings                            |             |            |         |             | Roving nystagmus<br>Not drawn to bright lights<br>Eye poking<br>Attenuated retinal vessels                                                                                                                                                                        | LCA                 |
| 1015                                     | c.2991+1655A>G<br>c.3181_3182delAT       |           | NLP since birth       |                                                                                |             |            |         | x           | No fundi data                                                                                                                                                                                                                                                     | LCA                 |
| 1212                                     | c.2991+1655A>G<br>c.1781T>A              | ✓         | LP since birth        | <b>0<sup>7</sup> + 1<sup>9</sup></b> Bilaterally flat ERG tracings             |             |            |         | x           | Fundi normal at <b>0<sup>7</sup></b>                                                                                                                                                                                                                              | LCA                 |
| 1576                                     | c.5587-1G>C<br>c.3175dupA                |           | LP since birth        |                                                                                |             |            |         | K           | Bilateral corneal grafts<br>Pigment spicules<br>Strong Bell's reflex precluded detailed retinal examination                                                                                                                                                       | LCA                 |
| 1950<br>4434                             | c.2991+1655A>G<br>c.297+3A>G             | ✓         | LP since birth        |                                                                                |             |            |         |             | Eye poking<br>No fundi data                                                                                                                                                                                                                                       | LCA                 |
| 1950<br>5249                             | c.2991+1655A>G<br>c.297+3A>G             | ✓         | LP now <b>17</b>      |                                                                                | ✓           | x          |         |             | Eye poking when younger<br>Coat's disease ( <b>12-13</b> ) exacerbated visual deficit<br>No fundi data                                                                                                                                                            | LCA                 |
| <b>LCA5 (NM_001122769.2)</b>             |                                          |           |                       |                                                                                |             |            |         |             |                                                                                                                                                                                                                                                                   | <b>OMIM #604537</b> |
| 1894<br>4326                             | c.1144_1147dupCTAA<br>c.1144_1147dupCTAA | ✓         | LP since birth        | <b>7<sup>3</sup></b><br>Bilaterally flat ERG tracings                          | ✓           |            | x       | K, C        | Eye poking<br>Dense asteroid hyalosis <sup>OD</sup> ; Waxy looking optic disc <sup>OS</sup> ; attenuated retinal vessels; bone spicule pigment clumping (very marked parafoveally); generalised retinal thinning;<br>Congenital Descemet's membrane abnormalities | CRD                 |
| 1894<br>4320                             | c.1144_1147dupCTAA<br>c.1144_1147dupCTAA |           | ~2% at birth, now NLP | <b>16<sup>7</sup></b> bilaterally flat consistent with absent retinal function |             |            |         |             | Does not exhibit eye poking<br>Previously, was always drawn to light/experienced flashing lights/floating spots<br>No fundi data<br>Other condition: Underactive thyroid                                                                                          | FA                  |

| RPGRI1 (NM_020366.3) |                                                                                                                      |   |                                                                                                        |                                                                                                                                                                                                                                                    |   |   |  |   |   | OMIM #613826                                                                                                                                                                                                                                                                                                                                                                                                                                                                                                                                                                                                                                                                                                                                                                                                           |     |
|----------------------|----------------------------------------------------------------------------------------------------------------------|---|--------------------------------------------------------------------------------------------------------|----------------------------------------------------------------------------------------------------------------------------------------------------------------------------------------------------------------------------------------------------|---|---|--|---|---|------------------------------------------------------------------------------------------------------------------------------------------------------------------------------------------------------------------------------------------------------------------------------------------------------------------------------------------------------------------------------------------------------------------------------------------------------------------------------------------------------------------------------------------------------------------------------------------------------------------------------------------------------------------------------------------------------------------------------------------------------------------------------------------------------------------------|-----|
| 0479<br>0235         | c.1219C>T;1763-8C>G<br>c.exon19del; chr14:<br>g.(21798302_21798377)<br>_(21798551_21799045)<br>del (hg19,NC000014.8) | ✓ | VA aided<br><b>3<sup>11</sup></b><br><6/60<br><b>4<sup>1</sup></b> ~6/60<br><b>5<sup>5</sup></b> <2/60 | <b>3<sup>11</sup></b> only VEP; Light<br>Flash VEP Amp; no<br>ERG<br><b>3<sup>11</sup></b> reduced amp <sup>BE</sup><br><b>4<sup>1</sup></b> grossly abml <sup>LE</sup><br><b>5<sup>5</sup></b> flat ERG tracings<br>bilaterally<br><br>amblyopia? |   |   |  | H | x | Hypermetropia at 3 months<br><b>3<sup>11</sup></b> reduced amplitudes-impaired conduction ONF-<br>central vision<br><b>4<sup>1</sup></b> no identifiable components recorded <sup>OU</sup> ;<br>abnormal small & large check VEP bilaterally;<br>reduced conduction ONF-central, paracentral and<br>peripheral vision <sup>OS</sup><br><b>5<sup>5</sup></b> flat rod, maximal rod-cone and flicker ERG<br>tracings <sup>OU</sup> -severe retinal dysfunction; contrast<br>sensitivity scores severely abnormal at all spatial<br>frequencies in OS and most of OD - large check<br>VEP impaired conduction ONF-paracentral<br>vision <sup>OD</sup> ; large check VEP showed better<br>reproducibility than at <b>4<sup>1</sup></b> ; light flash VEP<br>normal <sup>OU</sup> ; Mother light sensitive<br>No fundi data | LCA |
| 0479<br>0233         | c.1219C>T;1763-8C>G<br>c.exon19del; chr14:<br>g.(21798302_21798377)<br>_(21798551_21799045)<br>del (hg19,NC000014.8) | ✓ | <b>8<sup>5</sup></b> <6/60                                                                             | <b>8<sup>5</sup></b> EOG grossly<br>abnormal; Farnsworth-<br>Munsell D15 colour test<br>grossly abnormal;<br>bilaterally flat ERG<br>tracings                                                                                                      |   |   |  |   | x | <b>8<sup>5</sup></b> Unable to perform Arden Contrast sensitivity,<br>Farnsworth 100 Hue and Pattern ERG tests;<br>Mother light sensitive<br><b>8<sup>5</sup></b> Pigmentary changes to fundi                                                                                                                                                                                                                                                                                                                                                                                                                                                                                                                                                                                                                          | LCA |
| 1642<br>4913         | c.1447C>T<br>c.2935C>T                                                                                               | ✓ |                                                                                                        |                                                                                                                                                                                                                                                    | ✓ | ✓ |  |   | x | No fundi data                                                                                                                                                                                                                                                                                                                                                                                                                                                                                                                                                                                                                                                                                                                                                                                                          | LCA |
| 1642<br>3675         | c.1447C>T<br>c.2935C>T                                                                                               | ✓ | <b>30</b> 6/60 <sup>LE</sup><br>6/48 <sup>RE</sup>                                                     |                                                                                                                                                                                                                                                    | ✓ | ✓ |  |   | x | Constricted fields of vision at <b>30</b> – <b>3<sup>6OS</sup></b> / <b>5<sup>6OD</sup></b><br>Can see sparks of gold/bright light continuously if<br>concentrating<br>No fundi data                                                                                                                                                                                                                                                                                                                                                                                                                                                                                                                                                                                                                                   | LCA |
| SPATA7 (NM_018418.4) |                                                                                                                      |   |                                                                                                        |                                                                                                                                                                                                                                                    |   |   |  |   |   | OMIM #604232                                                                                                                                                                                                                                                                                                                                                                                                                                                                                                                                                                                                                                                                                                                                                                                                           |     |
| 1543<br>4058         | c.763C>T<br>c.763C>T                                                                                                 | ✓ | LB since<br>second<br>decade                                                                           |                                                                                                                                                                                                                                                    | x | x |  |   | → | Corneal transplant at <b>27</b> improved vision<br>No fundi data                                                                                                                                                                                                                                                                                                                                                                                                                                                                                                                                                                                                                                                                                                                                                       | LCA |
| 1543<br>3424         | c.763C>T<br>c.763C>T                                                                                                 | ✓ | LP since<br>birth                                                                                      |                                                                                                                                                                                                                                                    | x | x |  |   |   | More severe phenotype than sibling (above)<br>No fundi data                                                                                                                                                                                                                                                                                                                                                                                                                                                                                                                                                                                                                                                                                                                                                            | LCA |

| <b>TULP1 (NM_003322.3)</b> |                                                     |   |                                              |                                                         |   |   |   |   |  | <b>OMIM #613843</b>                                                                                                                                                                                                                                                                                                                                                                                         |     |
|----------------------------|-----------------------------------------------------|---|----------------------------------------------|---------------------------------------------------------|---|---|---|---|--|-------------------------------------------------------------------------------------------------------------------------------------------------------------------------------------------------------------------------------------------------------------------------------------------------------------------------------------------------------------------------------------------------------------|-----|
| 1620                       | c.524dupC<br>c.524dupC                              | ✓ | 17 <sup>1</sup> 6/60<br>18 <sup>1</sup> 3/60 |                                                         | ✓ | ✓ | M |   |  | Big drop in vision at 12 and 15 <sup>6</sup><br>17 <sup>1</sup> consistent 10° vision all direction from central fixation; beyond that irregular/spotted areas<br>18 <sup>1</sup> very little central vision left; blurred<br>No fundi data                                                                                                                                                                 | LCA |
| 2175<br>4820               | c.999+5G>C<br>c.1081C>T                             | ✓ | 10 <sup>3</sup> 6/60                         |                                                         | x | ✓ |   |   |  | Eye poking<br>Stares at bright light; central vision blurred; a little colour blind; no fundi data                                                                                                                                                                                                                                                                                                          | LCA |
| 2175<br>4821               | c.999+5G>C<br>c.1081C>T                             | ✓ | 7 6/120                                      |                                                         | x | ✓ |   |   |  | Eye poking<br>Stares at bright light; central vision blurred; vision worse than sibling (above); no fundi data                                                                                                                                                                                                                                                                                              | LCA |
| <b>Visual cycle</b>        |                                                     |   |                                              |                                                         |   |   |   |   |  |                                                                                                                                                                                                                                                                                                                                                                                                             |     |
| <b>RDH12 (NM_152443.2)</b> |                                                     |   |                                              |                                                         |   |   |   |   |  | <b>OMIM #612712</b>                                                                                                                                                                                                                                                                                                                                                                                         |     |
| 1425                       | c.316C>T <sup>NT</sup><br>c.697G>C <sup>NT</sup>    | ✓ | 0 5° PV<br>to<br>38 LP                       |                                                         | x | ✓ |   |   |  | Ophthalmic investigation at 0 <sup>6</sup> = rods and cones not developed properly, RPE pigment broken and scattered; strabismus and nyctalopia from birth; From 3 colour vision deteriorated; 8 could not see colour well; 13 no colour vision; vision stable until early 20's (became paler/washed out); lack of contrast; progression until 38 to LP in sunshine then blackness/like looking through fog | LCA |
| <b>RPE65 (NM_000329.2)</b> |                                                     |   |                                              |                                                         |   |   |   |   |  | <b>OMIM #204100</b>                                                                                                                                                                                                                                                                                                                                                                                         |     |
| 1404                       | c.130C>T<br>c.951_956delCTATGA                      |   | LB since birth                               |                                                         | x | ✓ |   |   |  | Has not seen ophthalmologist since late adolescence; could read large print at school; very light affected – completely night blind, prefers bright light; degree of sight depends on light level and task                                                                                                                                                                                                  | LCA |
| 1723                       | c.726-1G>A <sup>NT</sup><br>c.1040G>C <sup>NT</sup> | ✓ | <6/120 <sup>BE</sup>                         | 4 <sup>3</sup> ERG tracing bilaterally grossly abnormal | x | ✓ |   | x |  | 4 <sup>3</sup> ERG tracings show severely reduced response amplitudes<br>4 <sup>3</sup> Pale optic nerve heads, upbeat nystagmus; MRI shows prominent optic nerve sheaths                                                                                                                                                                                                                                   | LCA |

| Phototransduction cascade |                                          |   |                                                                                     |                                                                                                                                                                                        |   |   |    |   |                                                                                                                                                                                                                                                                                                                                                           |              |
|---------------------------|------------------------------------------|---|-------------------------------------------------------------------------------------|----------------------------------------------------------------------------------------------------------------------------------------------------------------------------------------|---|---|----|---|-----------------------------------------------------------------------------------------------------------------------------------------------------------------------------------------------------------------------------------------------------------------------------------------------------------------------------------------------------------|--------------|
| GUCY2D (NM_000180.3)      |                                          |   |                                                                                     |                                                                                                                                                                                        |   |   |    |   |                                                                                                                                                                                                                                                                                                                                                           | OMIM #204000 |
| 0535                      | c.307G>A<br>c.2595delG                   | ✓ | LP since birth                                                                      | <b>0<sup>4</sup></b> Grossly abnormal ERG & VER tracings<br><b>0<sup>11</sup></b> flat ERG tracings and abnormal VER                                                                   |   |   |    | x | <b>0<sup>11</sup></b> no medial opacities<br>Faintly present direct pupillary responses<br>Fundi normal except for poor foveal reflex <sup>OU</sup>                                                                                                                                                                                                       | LCA          |
| 1836                      | c.2302C>T<br>c.2516delC                  | ✓ |                                                                                     | <b>0<sup>7</sup></b> Flat ERG tracings (parent report )                                                                                                                                | x |   |    | x | Eye poking<br>Drawn to bright light<br>Fundi appear normal                                                                                                                                                                                                                                                                                                | LCA          |
| 2019                      | c.91_92insC<br>c.307G>A                  | ✓ | LP since birth                                                                      | <b>0<sup>9</sup></b> Full field ERG – no reproducible responses (dim white flash, brighter white flash, 30Hz flicker)                                                                  | x |   | HH | x | <b>0<sup>9</sup></b> Roving eye movements + intermittent nystagmus (horizontal or vertical); Drawn to bright light; sluggish pupillary responses<br>Eye poking<br>Fundi appear normal, with some abnormality in the reflection from the inner limiting membrane at high magnification                                                                     | LCA          |
| 2123                      | c.2383C>T<br>c.2646C>G                   | ✓ | LP/ NLP since birth                                                                 | <b>0<sup>6</sup></b> Cutaneous ERGS- severely depressed in amplitude bilaterally; VEP shows severely reduced visual function                                                           |   |   |    |   | No abnormality noted via retinal imaging                                                                                                                                                                                                                                                                                                                  | LCA          |
| 2599                      | c.2302C>T; 2345T>A<br>c.2302C>T; 2345T>A | ✓ | LP since birth                                                                      |                                                                                                                                                                                        |   |   | M  |   | Eye poking<br>Drawn to light<br>Sluggish pupillary responses<br>No fundi data                                                                                                                                                                                                                                                                             | LCA          |
| Cell – cell interaction   |                                          |   |                                                                                     |                                                                                                                                                                                        |   |   |    |   |                                                                                                                                                                                                                                                                                                                                                           |              |
| CRB1 (NM_201253.2)        |                                          |   |                                                                                     |                                                                                                                                                                                        |   |   |    |   |                                                                                                                                                                                                                                                                                                                                                           | OMIM #613835 |
| 0306<br>0459              | c.1793delC<br>c.2843G>A                  | ✓ | <b>18<sup>4</sup></b><br>HM/LP <sup>RE</sup><br>LP <sup>LE</sup>                    | <b>18<sup>4</sup></b> bilaterally flat ERG tracings                                                                                                                                    |   | ✓ |    | x | Disease progression gradual until <b>15-16</b> , then deterioration<br><b>18<sup>4</sup></b> - bilateral pigmentary retinopathy; typical paramacular donut ring of vision; colour vision absent; normal but sluggish pupillary responses<br><b>20</b> - depression                                                                                        | LCA          |
| 0306<br>0458              | c.1793delC<br>c.2843G>A                  | ✓ | <b>5<sup>7</sup></b> 3/60<br><b>8<sup>0</sup></b> 3/60<br>unaided,<br>5/60<br>aided | <b>5<sup>7</sup> + 8<sup>0</sup></b> bilaterally flat ERG tracings <b>5<sup>7</sup></b> Arden CST normal<br><b>8<sup>0</sup></b> Arden CST total scores normal but individual abnormal |   | ✓ |    | x | <b>5<sup>7</sup></b> – small gliotic discs, pigmentary retinopathy, atrophic macula, arterioles attenuated, constricted fields, colour vision absent; pupillary responses sluggish; had bilateral surgical intervention for nystagmus;<br>Disease progression gradual till <b>15-17</b> , then deterioration; further stable until <b>23</b> then further | LCA          |

|                                           |                                  |   |                                   |  |   |   |  |   |                                                                                                                                                                                                                                                                                 |                     |
|-------------------------------------------|----------------------------------|---|-----------------------------------|--|---|---|--|---|---------------------------------------------------------------------------------------------------------------------------------------------------------------------------------------------------------------------------------------------------------------------------------|---------------------|
|                                           |                                  |   |                                   |  |   |   |  |   | deterioration; initially peripheral vision was worse than central vision but central vision has now deteriorated ( <b>28</b> ); uses what peripheral vision is left; reports blue-green colourblindness                                                                         |                     |
| 2274                                      | c.613_619delATAGGAA<br>c.2843G>A | ✓ | 43 <sup>6</sup> LP                |  | ✓ | ✓ |  | C | Noticed deterioration by <b>30</b> . Has experienced peripheral and central vision loss, flashing lights and floating spots; has always worn glasses<br>No fundi data                                                                                                           | LCA                 |
| <b>Neuroprotection</b>                    |                                  |   |                                   |  |   |   |  |   |                                                                                                                                                                                                                                                                                 |                     |
| <b>NMNAT1</b> (NM_022787.3)               |                                  |   |                                   |  |   |   |  |   |                                                                                                                                                                                                                                                                                 | <b>OMIM #608553</b> |
| 1565                                      | c.507G>A<br>c.769G>A             | ✓ |                                   |  | ✓ |   |  |   | No fundi data                                                                                                                                                                                                                                                                   | LCA                 |
| 1819                                      | c.364delA<br>c.500A>G            | ✓ | LP since birth                    |  | ✓ |   |  |   | No fundi data                                                                                                                                                                                                                                                                   | LCA                 |
| 1965                                      | c.364delA<br>c.769G>A            | ✓ | NLP since birth                   |  | ✓ |   |  |   | No fundi data                                                                                                                                                                                                                                                                   | LCA                 |
| <b>Protein chaperones and trafficking</b> |                                  |   |                                   |  |   |   |  |   |                                                                                                                                                                                                                                                                                 |                     |
| <b>AIPL1</b> (NM_014336.3)                |                                  |   |                                   |  |   |   |  |   |                                                                                                                                                                                                                                                                                 | <b>OMIM #604393</b> |
| 2030<br>5551                              | c.355_358delCACA<br>c.834G>A     |   | LP at birth; ~ <b>25</b><br>- NLP |  | x | x |  | K | Eye poking<br>Participant reports enophthalmia and corneal damage due to eye poking<br>Not drawn to light – used to see flashing lights in vision until deterioration to NLP in mid <b>20</b> 's<br>No fundi data – has not seen ophthalmologist since childhood (~ <b>10</b> ) | LCA                 |
| 2030<br>5553                              | c.355_358delCACA<br>c.834G>A     |   | LP since birth                    |  | x | x |  | x | Eye poking<br>No fundi data                                                                                                                                                                                                                                                     | LCA                 |
| 2272<br>3117                              | c.277-2A>G<br>c.834G>A           | ✓ | LP since birth                    |  |   |   |  | x | Eye poking<br>No fundi data                                                                                                                                                                                                                                                     | LCA                 |
| 2272<br>3118                              | c.277-2A>G<br>c.834G>A           | ✓ | LP since birth                    |  | x | x |  | x | Developmental delay<br>Symptoms worse than sibling (above)<br>Eye poking<br>Stared at bright lights when younger<br>No fundi data                                                                                                                                               | LCA                 |

Age reported = years<sup>months</sup>; ✓ = present, x = not present, blank field = no data available;

**Abbreviations:** Ant Seg Abn, anterior segment abnormalities; C, cataract/s; CRD, cone-rod dystrophy; Dx, diagnosis; ERG, electroretinography; FA, fundus albipunctatus; H, hypermetropia; HH, high hypermetropia; HM, hand motion; K, keratoconus; LB, legally blind (VA≤6/60/visual field <10°); LCA, Leber congenital amaurosis; LP, light perception; M, myopia; NLP, no light perception; NT, not tested in parents (biallelism not determined); OD, oculus dexter (right eye); OMIM #, MIM Phenotype Number; OS, oculus sinister (left eye); OU, oculus uterque (both eyes); Ref Err, refractive errors; VA, visual acuity; VEP, vision evoked potentials.
